# Supplementary material for: [Mn（SCZ）3]（PA）2·H2O的晶体结构及热分解机理
Source: Royal Society of Chemistry journal article supplement (doi:10.1039/c3cp51817e), 2004-01-01
Supplement: c3cp51817e.xlsx [file c3cp51817e.xlsx]

## Sheet: Feuil1
	ρ (g/cm3)	space group	SG number	system	channel dim	Vm (cm3/g)	E / SiO2 (kJ/mol)	synthesized?
ABW	1.731	I m m a	74	ortho	1	0.577701	8.01314
AEI	1.449	C m c m	63	ortho	3	0.690131	18.6887
AEL	1.769	I m m a	74	ortho	1	0.565291	6.41303
AEN	1.889	C m c a	64	ortho	2	0.529381	10.9173
AET	1.65	C m c m	63	ortho	1	0.606061	11.3947
AFG	1.639	P 63/m m c	194	hexa	0	0.610128	8.24145
AFI	1.629	P 6/m c c	192	hexa	1	0.613874	8.98839	1
AFN	1.659	C 2/m	12	mono	3	0.602773	20.8417
AFO	1.781	C m c m	63	ortho	1	0.561482	6.74343
AFR	1.437	P m m n	59	ortho	2	0.695894	19.6178
AFS	1.388	P 63/m c m	193	hexa	3	0.720461	21.7817
AFT	1.45	P 63/m m c	194	hexa	3	0.689655	18.5225
AFX	1.45	P 63/m m c	194	hexa	3	0.689655	18.5441
AFY	1.324	P -3 1 m	162	trigonal	3	0.755287	30.5876
AHT	1.783	C m c m	63	ortho	1	0.560852	17.404
ANA	1.85	I a 3 d	230	cubic	3	0.540541	16.4237
APC	1.689	C m c a	64	ortho	2	0.592066	14.3733
APD	1.751	C m c a	64	ortho	2	0.571102	10.0483
AST	1.547	F m 3 m	225	cubic	0	0.646412	12.2075	1
ASV	1.876	P 4/m c c	124	tetra	1	0.533049	24.6245
ATN	1.702	I 4/m m m	139	tetra	1	0.587544	10.0038
ATO	1.801	R -3 m	166	trigonal	1	0.555247	7.67283
ATS	1.547	C m c m	63	ortho	1	0.646412	12.9363	1
ATT	1.653	P m m a	51	ortho	2	0.604961	15.74
ATV	1.854	C m m a	67	ortho	1	0.539374	4.26846
AWO	1.73	C m c a	64	ortho	1	0.578035	14.546
AWW	1.597	P 4/n m m	129	tetra	1	0.626174	14.2242
BCT	1.866	I 4/m m m	139	tetra	1	0.535906	2.87981
BEA	1.463	P 41 2 2	91	tetra	3	0.683527	14.0123	1
BEC	1.434	P 42/m m c	131	tetra	3	0.69735	16.0554	1
BIK	1.834	C m c m	63	ortho	1	0.545256	3.35828
BOF	1.73	P n m a	62	ortho	1	0.578035	11.684
BOG	1.496	I m m a	74	ortho	2	0.668449	14.4457
BOZ	1.184	C m c m	63	ortho	3	0.844595	55.8385
BPH	1.388	P -6 2 m	189	hexa	3	0.720461	21.8623
BRE	1.708	P 21/m	11	mono	2	0.58548	14.1779
BSV	1.704	I a -3 d	230	cubic	3	0.586854	48.0713
CAN	1.642	P 63/m m c	194	hexa	1	0.609013	8.61071
CAS	1.843	C m c m	63	ortho	1	0.542594	2.90242
CDO	1.749	C m c m	63	ortho	2	0.571755	12.5807	1
CFI	1.617	I m m a	74	ortho	1	0.618429	7.83135	1
CGF	1.713	C 2/m	12	mono	2	0.583771	19.792
CGS	1.581	P n m a	62	ortho	3	0.632511	24.3555
CHA	1.45	R -3 m	166	trigonal	3	0.689655	18.4779	1
CON	1.487	C 2/m	12	mono	3	0.672495	14.4759
CZP	1.924	P 61 2 2	178	hexa	1	0.519751	45.9519
DAC	1.695	C 2/m	12	mono	2	0.589971	8.81414
DDR	1.618	R -3 m	166	trigonal	2	0.618047	5.68115	1
DFO	1.405	P 6/m m m	191	hexa	3	0.711744	21.5941
DFT	1.716	P 42/m m c	131	tetra	3	0.582751	13.5585
DON	1.579	C m c m	63	ortho	1	0.633312	8.28496	1
EAB	1.538	P 63/m m c	194	hexa	2	0.650195	16.4225
EDI	1.564	P -4 m 2	115	tetra	3	0.639386	24.9623
EPI	1.708	C 2/m	12	mono	2	0.58548	9.87809
ERI	1.546	P 63/m m c	194	hexa	3	0.646831	16.3548
ETR	1.459	P 63 m c	186	hexa	3	0.685401	26.613
EUO	1.654	C m m a	67	ortho	1	0.604595	7.91611	1
EZT	1.599	I m m a	74	ortho	1	0.625391	18.1705
FAR	1.635	P 63/m m c	194	hexa	0	0.611621	7.80073	1
FAU	1.255	F d 3 m	227	cubic	3	0.796813	22.6772	1
FER	1.712	I m m m	71	ortho	2	0.584112	8.00798	1
FRA	1.632	P -3 m 1	164	trigonal	0	0.612745	7.50929
GIS	1.585	I 41/a m d	141	tetra	3	0.630915	17.408
GIU	1.638	P 63/m m c	194	hexa	0	0.610501	8.09624
GME	1.45	P 63/m m c	194	hexa	3	0.689655	18.6242
GON	1.726	C 2 2 2	21	ortho	1	0.579374	5.49595	1
GOO	1.74	C 2 2 21	20	ortho	3	0.574713	23.0004
HEU	1.651	C 2/m	12	mono	2	0.605694	12.4139
IFR	1.591	C 2/m	12	mono	1	0.628536	15.6534	1
IHW	1.729	C m c a	64	ortho	2	0.578369	8.53719	1
ISV	1.43	P 42/m m c	131	tetra	3	0.699301	16.6809	1
ITE	1.521	C m c m	63	ortho	2	0.657462	13.5019	1
ITH	1.634	A m m 2	38	ortho	3	0.611995	10.7617	1
ITW	1.699	C 2/m	12	mono	2	0.588582	13.687	1
IWR	1.473	C m m m	65	ortho	3	0.678887	15.8626	1
JBW	1.824	P m m a	51	ortho	1	0.548246	6.11267
JOZ	1.526	P 2/b 21/c 21/m	57	ortho	3	0.655308	39.6525
JRY	1.781	I 21 21 21	24	ortho	1	0.561482	11.5791
JSN	1.656	P 1 2/c 1	13	mono	2	0.603865	17.7756
JST	1.316	P a -3	205	cubic	3	0.759878	64.8941
JSW	1.737	P 21/b 21/c 21/a	61	ortho	1	0.575705	17.8739
KFI	1.442	I m 3 m	229	cubic	3	0.693481	19.0705
LAU	1.709	C 2/m	12	mono	1	0.585138	15.6633
LEV	1.538	R -3 m	166	trigonal	2	0.650195	16.2829
LIO	1.638	P -6 m 2	187	hexa	0	0.610501	8.15173
LOS	1.636	P 63/m m c	194	hexa	0	0.611247	7.96439
LOV	1.601	P 42/m m c	131	tetra	3	0.62461	28.1477
LTA	1.355	P m 3 m	221	cubic	3	0.738007	17.5731	1
LTL	1.59	P 6/m m m	191	hexa	1	0.628931	19.4884
MAR	1.636	P 63/m m c	194	hexa	0	0.611247	7.92394
MAZ	1.6	P 63/m m c	194	hexa	1	0.625	18.7947
MEI	1.38	P 63/m	176	hexa	3	0.724638	21.7849
MEL	1.649	I -4 m 2	119	tetra	3	0.606428	8.07264	1
MEP	1.744	P m 3 n	223	cubic	0	0.573394	0.913516
MER	1.575	I 4/m m m	139	tetra	3	0.634921	19.0109
MON	1.711	I 41/a m d	141	tetra	2	0.584454	12.3758
MOR	1.648	C m c m	63	ortho	1	0.606796	10.2286
MRE	1.794	I m m a	74	ortho	1	0.557414	3.44469
MSE	1.547	P 42/m n m	136	tetra	3	0.646412	12.0399
MSO	1.741	R -3 m	166	trigonal	0	0.574383	11.3191
MTF	1.934	C 2/m	12	mono	1	0.517063	4.32737	1
MTN	1.697	F d 3 m	227	cubic	0	0.589275	1.14767	1
MTW	1.714	C 2/m	12	mono	1	0.583431	5.61922	1
MVY	1.96	P n n m	58	ortho	1	0.510204	25.4827
NAB	1.517	I -4 m 2	119	tetra	3	0.659196	39.0395
NAT	1.565	I 41/a m d	141	tetra	3	0.638978	24.5284
NES	1.601	F m m m	69	ortho	2	0.62461	12.0641
NON	1.735	F m m m	69	ortho	0	0.576369	3.54889	1
NPO	1.53	P -6 2 c	190	hexa	1	0.653595	27.3262
NPT	1.256	F m -3 c	226	cubic	3	0.796178	49.7984
NSI	1.845	C 2/m	12	mono	2	0.542005	2.72701	1
OBW	1.173	I 4/m m m	139	tetra	3	0.852515	56.9681
OFF	1.545	P -6 m 2	187	hexa	1	0.647249	16.5271
OSI	1.706	I 4/m m m	139	tetra	1	0.586166	7.90814
OSO	1.2	P 62 2 2	180	hexa	3	0.833333	67.6292
OWE	1.656	P m m a	51	ortho	2	0.603865	16.7764
PHI	1.574	C m c m	63	ortho	3	0.635324	18.3284
PON	1.703	P c a 21	29	ortho	1	0.587199	15.6626
PUN	1.398	P b c n	60	ortho	3	0.715308	38.5407
RHO	1.379	I m 3 m	229	cubic	3	0.725163	21.3803
RRO	1.684	P 2/c	13	mono	2	0.593824	14.6905	1
RSN	1.6	C 2/m	12	mono	3	0.625	28.0146
RTE	1.622	C 2/m	12	mono	1	0.616523	10.5514	1
RTH	1.523	C 2/m	12	mono	2	0.656599	13.4147
RUT	1.662	C 2/m	12	mono	0	0.601685	7.97253	1
RWR	1.851	I 41/a m d	141	tetra	1	0.540249	10.7656	1
RWY	0.733	I -4 3 m	217	cubic	3	1.36426	99.1924
SAF	1.749	I 2/b 2/a 2/m	72	ortho	1	0.571755	7.62815
SAO	1.321	I -4 m 2	119	tetra	3	0.757002	22.8186
SAS	1.482	I 4/m m m	139	tetra	1	0.674764	15.5186	1
SAV	1.448	P 4/n m m	129	tetra	3	0.690608	19.112
SBN	1.535	P 63/m m c	194	hexa	3	0.651466	33.0571
SBS	1.299	P 63/m m c	194	hexa	3	0.769823	23.6363
SFE	1.642	P 21/m	11	mono	1	0.609013	9.89403
SFF	1.604	P 21/m	11	mono	1	0.623441	11.7093
SFN	1.578	C 2/m	12	mono	1	0.633714	9.84972
SFO	1.438	C 2/m	12	mono	2	0.69541	19.5838
SGT	1.654	I 41/a m d	141	tetra	0	0.604595	8.99901	1
SIV	1.577	C m c m	63	ortho	3	0.634115	17.9114
SOD	1.629	I m 3 m	229	cubic	0	0.613874	7.01813	1
SOF	1.562	C 2/c	15	mono	3	0.640205	19.8137
SOS	1.611	P m n a	53	ortho	3	0.620732	53.669
SSF	1.585	P 6/m m m	191	hexa	2	0.630915	11.2136
SSY	1.641	P m m n	59	ortho	1	0.609385	9.98422
STF	1.601	C 2/m	12	mono	1	0.62461	11.2016	1
STI	1.605	F m m m	69	ortho	2	0.623053	15.5649
STW	1.534	P 61 2 2	178	hexa	3	0.65189	21.179
SZR	1.699	C m m m	65	ortho	3	0.588582	11.0022
THO	1.565	P m m a	51	ortho	3	0.638978	24.7439
TON	1.774	C m c m	63	ortho	1	0.563698	4.70425	1
TSC	1.262	F m 3 m	225	cubic	3	0.792393	21.5814
UEI	1.729	F m m 2	42	ortho	2	0.578369	14.7507
UFI	1.442	I 4/m m m	139	tetra	2	0.693481	14.5337
UOS	1.677	P m m a	51	ortho	3	0.596303	14.4529
UOZ	1.811	P 4/n n c	126	tetra	0	0.552181	23.047
USI	1.49	C 2/m	12	mono	2	0.671141	24.6354
VET	1.805	P -4	81	tetra	1	0.554017	6.4802	1
VFI	1.36	P 63/m c m	193	hexa	1	0.735294	18.8253
VNI	1.665	P 42/n c m	138	tetra	3	0.600601	25.6918
VSV	1.598	I 41/a m d	141	tetra	3	0.625782	27.8714
WEI	1.486	C c c m	66	ortho	3	0.672948	42.5851
YUG	1.729	C 2/m	12	mono	2	0.578369	10.3737
ZON	1.656	P b c m	57	ortho	2	0.603865	17.902
alpha-quartz	2.3847					0.41934	0
