# Supplementary material for: [Mn（SCZ）3]（PA）2·H2O的晶体结构及热分解机理
Source: Royal Society of Chemistry journal article supplement (doi:10.1039/c3cp51817e), 2004-01-01
Supplement: c3cp51817e_2.xlsx [file c3cp51817e_2.xlsx]

## Sheet: Feuil1
	Emin (GPa)	Emax (GPa)	βmin (1/TPa)	βmax (1/TPa)	Gmin (GPa)	Gmax (GPa)	λ1 (GPa)	λ2 (GPa)	λ3 (GPa)	λ4 (GPa)	λ5 (GPa)	λ6 (GPa)	system	ρ (g/cm3)	E/SiO2 vs quartz (kJ/mol)	Synthesized?
ABW	19.3644	135.417	-8.31172	22.7749	8.06177	51.841	12.149	15.0576	27.866	51.841	100.771	364.746	orthorhombic	1.7308	8.01314
AEI	33.464	77.2753	3.51874	4.58156	11.077	30.2601	11.077	19.807	28.3692	31.853	59.5793	239.726	orthorhombic	1.4489	18.6887
AEL	70.9067	200.187	2.1727	4.48796	21.462	62.8147	21.462	34.416	39.267	73.1761	146.806	353.347	orthorhombic	1.7691	6.41303
AEN	74.0508	126.538	2.09047	4.05793	25.105	55.5743	25.105	31.587	33.114	53.3662	116.934	300.51	orthorhombic	1.8886	10.9173
AET	43.4697	185.755	1.98811	8.47348	15.2732	43.1062	22.3	30	30.2329	31.139	113.964	267.006	orthorhombic	1.6501	11.3947
AFG	67.1167	114.475	2.04712	3.55303	23.272	34.9423	23.272	23.272	25.651	51.303	79.1496	333.503	hexagonal	1.6389	8.24146
AFI	84.7143	182.113	2.37789	3.61714	32.814	50.3753	28.869	32.814	32.814	57.738	132.635	319.965	hexagonal	1.6286	8.98839	1
AFN	25.4819	128.779	-0.215139	25.5146	12.1944	45.1698	12.1944	14.4032	22.2826	35.9743	88.9925	207.844	monoclinic	1.6594	20.8417
AFO	30.8933	201.049	2.10916	4.56815	8.38	66.42	8.38	34.167	37.193	86.3353	144.343	340.576	orthorhombic	1.7806	6.74343
AFR	26.9109	65.2639	3.83385	6.63064	8.168	25.4086	8.168	19.539	24.085	39.9348	51.3818	182.061	orthorhombic	1.4373	19.6178
AFS	38.7491	76.5876	3.54966	6.56876	12.392	24.4755	12.392	12.392	19.791	39.583	52.7203	184.799	hexagonal	1.3884	21.7817
AFT	19.0168	69.7869	2.36047	8.27134	8.31238	28.004	13.7202	22.432	28.004	28.004	44.864	237.107	hexagonal	1.4498	18.5226
AFX	18.8582	70.3814	2.16978	8.73805	8.29651	28.323	13.6758	22.606	28.323	28.323	45.213	236.979	hexagonal	1.4498	18.5441
AFY	30.816	89.3248	4.65585	8.19679	10.7123	25.1071	10.7123	10.9044	15.5217	30.4966	62.6696	149.146	hexagonal	1.3243	30.5876
AHT	33.4115	196.877	-1.74116	21.0968	19.5043	67.2396	27.386	31.2036	40.421	41.484	146.186	325.863	orthorhombic	1.783	17.404
ANA	95.2064	114.646	3.24992	3.24992	35.385	43.6345	35.385	35.385	35.385	87.269	87.269	307.7	cubic	1.8501	16.4237
APC	21.6431	115.473	-6.29894	13.7899	9.30487	44.932	16.7328	23.092	39.7894	40.766	44.932	299.454	orthorhombic	1.6888	14.3733
APD	24.264	125.309	2.07102	3.81153	6.46477	45.623	12.9288	35.845	36.793	45.623	91.5953	346.106	orthorhombic	1.7512	10.0483
AST	28.4497	97.4336	3.14221	3.14221	9.7745	36.169	19.549	19.549	36.169	36.169	36.169	318.247	cubic	1.5469	12.2076	1
ATN	28.211	136.499	2.98003	3.51067	7.575	42.7899	7.575	16.821	16.821	51.1	110.285	317.831	tetragonal	1.7021	10.0038
ATO	68.625	129.696	2.17636	4.24408	24.369	41.9958	24.3688	31.5333	39.4222	60.9317	88.5786	291.375	hexagonal	1.801	7.67283
ATS	39.4201	123.19	2.50967	5.62909	11.7	44.8277	11.7	18.646	19.958	72.4499	97.424	259.493	orthorhombic	1.5467	12.9363	1
ATT	18.1722	84.2861	-8.58913	24.7159	8.08	42.731	14.9444	17.59	18.778	33.6357	42.731	293.238	orthorhombic	1.6528	15.74
ATV	53.5817	208.34	1.1748	4.38726	16.6559	43.6084	17.18	33.2025	39.827	40.629	158.251	401.636	orthorhombic	1.8544	4.26846
AWO	28.2665	67.4183	-1.63432	20.0279	13.226	30.259	19.219	22.891	24.9422	30.259	34.1721	296.805	orthorhombic	1.7299	14.546
AWW	56.1611	65.2858	3.2629	5.66267	16.6865	25.698	20.576	25.698	25.698	33.373	43.2065	250.266	tetragonal	1.597	14.2242
BCT	62.9207	155.389	1.31829	2.96211	19.0365	49.075	38.073	40.886	49.075	49.075	103.893	429.02	tetragonal	1.866	2.87981
BEC	46.6542	73.8365	0.342502	7.5084	18.9417	28.584	18.112	28.584	28.584	37.6978	41.025	218.021	tetragonal	1.4341	16.0554	1
BIK	87.9234	166.886	2.49273	2.72197	30.342	80.8096	30.342	60.018	63.528	73.4201	163.247	381.588	orthorhombic	1.8343	3.35828
BPH	38.6627	76.1567	3.55855	6.53482	12.326	24.4803	12.326	12.326	20.023	40.045	52.4804	185.287	hexagonal	1.388	21.8623
BRE	30.0279	115.098	1.5474	6.51649	8.43827	45.9534	8.43827	13.7747	24.0618	60.9576	90.3386	235.212	monoclinic	1.7075	14.1779
BSV	62.8809	77.1621	5.26801	5.26801	23.562	29.752	29.752	29.752	29.752	47.124	47.124	189.825	cubic	1.7043	48.0713
CAN	58.1471	132.47	2.1833	3.52349	18.852	39.1538	18.852	18.852	26.253	52.506	93.1919	330.621	hexagonal	1.6418	8.61071
CAS	96.7031	129.805	2.24997	3.22818	34.165	50.8956	34.165	34.806	37.115	100.644	135.427	381.872	orthorhombic	1.843	2.90243
CDO	76.2911	153.879	2.8854	4.28735	25.224	70.7465	25.224	29.892	30.642	87.3046	141.531	294.282	orthorhombic	1.7489	12.5807	1
CFI	78.6408	116.913	2.26238	4.07355	25.487	39.4872	25.487	29.168	35.023	72.0149	104.314	298.636	orthorhombic	1.6172	7.83135	1
CGF	25.0996	110.785	3.21389	18.5428	8.2218	38.5296	8.2218	14.6572	30.3431	37.7391	78.2452	112.058	monoclinic	1.7126	19.792
CHA	19.1423	80.7915	2.6836	7.49598	8.25495	30.4545	13.683	19.7025	25.1401	30.4545	47.7349	237.365	hexagonal	1.4497	18.4779	1
CZP	54.1942	133.344	0.979329	10.3266	21.443	39.88	21.443	39.88	39.88	42.887	62.2375	199.259	hexagonal	1.9243	45.9519
DAC	66.88	105.256	2.01463	6.04987	24.1531	60.6193	25.9504	27.4674	36.1096	66.8438	120.904	313.17	monoclinic	1.6952	8.81414
DFT	22.7084	59.4248	1.46735	9.26163	6.037	30.7759	6.037	12.305	12.305	52.8492	91.352	316.784	tetragonal	1.7165	13.5585
EAB	44.4683	70.1128	0.819168	5.79303	15.5119	27.709	20.84	27.709	27.709	28.4434	41.681	252.662	hexagonal	1.5376	16.4225
EDI	24.7457	106.861	3.14288	4.31588	7.617	47.4629	7.617	7.617	11.922	86.7588	130.305	286.072	tetragonal	1.5645	24.9623
EPI	76.5411	151.97	2.8885	4.67993	25.6453	59.1115	25.6453	35.0277	45.9244	64.5948	85.1567	277.562	monoclinic	1.7078	9.87809
ERI	57.151	63.3744	1.20233	5.42519	19.5593	22.429	22.429	22.429	23.703	36.733	47.405	259.956	hexagonal	1.5458	16.3548
FAU	45.6874	53.2305	5.43177	5.43177	16.6025	19.636	19.636	19.636	19.636	33.205	33.205	184.102	cubic	1.2552	22.6772	1
FER	66.9999	162.062	2.66862	3.64771	25.973	48.2129	20.707	25.973	30.392	83.6779	132.717	311.205	orthorhombic	1.7116	8.00798	1
GIS	18.0129	94.7974	-13.6507	19.2086	8.41917	39.815	13.775	16.7633	20.615	39.815	39.815	278.762	tetragonal	1.5848	17.408
GME	18.1659	73.2672	1.6207	10.0734	8.18236	28.851	13.3434	24.662	28.851	28.851	49.324	237.357	hexagonal	1.4499	18.6242
GON	38.205	149.136	2.19687	4.73653	11.525	45.577	11.525	26.144	45.577	51.5898	113.577	347.269	orthorhombic	1.7258	5.49595	1
GOO	39.2823	83.5639	4.23471	14.5974	15.447	30.709	15.447	25.763	30.709	34.3692	49.6916	157.911	orthorhombic	1.7403	23.0004
HEU	35.0772	110.578	1.21594	7.02067	10.9318	44.5581	10.9318	12.3562	31.3727	68.1307	86.6061	219.739	monoclinic	1.6509	12.4139
IFR	41.1773	95.4241	1.24186	10.5053	17.142	37.4984	17.1691	22.0239	27.2151	30.6019	85.0526	181.733	monoclinic	1.5907	15.6534	1
ITE	43.1248	81.4624	3.63259	6.05203	13.27	35.9335	13.27	16.907	22.978	48.8535	73.0917	220.694	orthorhombic	1.5211	13.5019	1
ITW	37.0874	90.9156	1.39273	8.26739	13.8432	35.4122	25.377	26.6349	35.2658	35.3231	51.8272	279.17	monoclinic	1.6991	13.687	1
IWR	38.8952	80.8264	2.50862	7.49028	15.0016	35.591	24.778	27.157	28.872	35.591	55.482	211.45	orthorhombic	1.4731	15.8626	1
JBW	46.0079	147.902	0.336515	5.79889	15.3402	40.777	18.293	22.871	30.4651	40.777	111.173	369.002	orthorhombic	1.8241	6.11267
JOZ	30.3792	121.055	4.34018	6.55422	8.505	44.0599	8.505	18.053	24.473	68.3796	94.1208	200.912	orthorhombic	1.526	39.6525
JRY	57.3973	106.685	2.82829	4.11517	18.327	46.881	18.327	22.295	37.499	51.5802	93.4567	286.895	orthorhombic	1.7812	11.5791
JSN	17.4081	77.8045	0.535443	8.05878	4.99482	33.4646	4.99482	13.8335	24.4142	48.4109	66.6093	205.432	monoclinic	1.6564	17.7756
JST	22.2295	22.6077	79.8594	79.8594	18.15	18.9255	12.522	18.15	18.15	18.15	37.851	37.851	cubic	1.3164	64.8941
KFI	40.5838	69.3609	4.09853	4.09853	14.322	25.5405	14.322	14.322	14.322	51.081	51.081	243.99	cubic	1.4422	19.0705
LAU	25.5704	93.7129	-1.30807	19.5368	12.3969	34.0628	14.5021	21.3688	22.0017	31.7032	64.3775	168.767	monoclinic	1.7095	15.6633
LEV	49.4408	70.2224	0.46709	5.91651	17.3869	26.957	19.732	26.8992	26.957	33.1645	39.5478	259.96	hexagonal	1.5379	16.2829
LIO	66.9488	111.607	1.95263	3.60094	23.365	33.9684	23.365	23.365	25.203	50.406	76.4915	334.308	hexagonal	1.6379	8.15174
LOS	67.7253	105.074	1.78619	3.67276	24.195	32.0256	24.195	24.195	24.491	48.982	71.007	336.445	hexagonal	1.6358	7.96439
LOV	35.3433	78.4654	2.58825	7.37276	9.744	37.0226	9.744	25.842	25.842	69.752	79.907	271.586	tetragonal	1.6013	28.1477
LTA	62.7098	67.2896	3.99898	3.99898	22.81	24.64	24.64	24.64	24.64	45.62	45.62	250.064	cubic	1.3548	17.5731	1
LTL	31.2947	51.9634	5.14371	7.68037	9.437	15.9334	9.437	15.034	15.034	18.875	41.2219	169.176	hexagonal	1.5901	19.4884
MAZ	40.608	99.7565	4.01793	4.10622	11.8275	24.6503	11.828	18.922	18.922	23.655	77.1946	247.086	hexagonal	1.6003	18.7947
MEI	36.3895	105.652	3.25887	6.18517	11.322	30.379	11.322	11.322	19.838	39.675	72.6429	200.508	hexagonal	1.3796	21.7849
MEP	107.118	108.551	3.16289	3.16289	40.252	40.86	40.252	40.252	40.252	81.72	81.72	316.167	cubic	1.7443	0.913513
MER	14.6115	94.2546	-4.53257	35.5986	7.35549	28.733	8.702	13.0288	28.733	28.733	79.761	279.777	tetragonal	1.5749	19.0109
MON	91.4044	135.74	2.6234	4.27767	34.188	60.0599	33.004	34.188	34.188	117.994	121.665	326.788	tetragonal	1.7111	12.3758
MOR	71.2277	156.133	2.53082	6.06502	23.367	52.4125	23.367	27.366	34.293	57.024	115.994	285.329	orthorhombic	1.6478	10.2286
MSO	13.8657	114.587	-4.79859	39.1879	8.53134	44.7473	12.4921	28.317	30.0058	44.747	84.4582	267.547	hexagonal	1.7408	11.3191
MTN	114.519	115.353	2.50998	2.50998	42.218	42.5585	42.218	42.218	42.218	85.117	85.117	398.41	cubic	1.6975	1.14767	1
MTW	44.4709	108.147	2.09674	6.69452	14.3539	54.4042	14.3539	35.4737	40.3881	42.543	101.065	305.44	monoclinic	1.7141	5.61922	1
MVY	64.0441	143.276	-2.03825	21.7897	19.76	49.5064	19.76	28.6892	34.805	51.496	109.172	245.896	orthorhombic	1.9601	25.4827
NAB	71.4086	101.223	3.48058	5.80686	22.231	42.0654	22.231	36.134	36.134	70.794	88.4148	244.766	tetragonal	1.5167	39.0395
NAT	30.1418	116.79	3.20245	4.13558	9.78	51.1466	9.78	9.78	12.249	95.3063	129.719	286.881	tetragonal	1.5648	24.5284
NON	106.3	125.912	2.36524	3.33939	37.572	48.3947	37.572	39.389	42.889	82.4235	96.8381	363.096	orthorhombic	1.7348	3.54889	1
NPO	96.0631	128.965	0.295141	5.66033	39.0278	42.563	42.563	42.563	43.745	71.895	87.49	309.154	hexagonal	1.5295	27.3262
NPT	62.2927	68.394	5.33228	5.33228	23.3495	25.953	25.953	25.953	25.953	46.699	46.699	187.537	cubic	1.256	49.7984
NSI	63.3445	158.07	1.58662	4.06405	20.6486	69.9398	20.6486	35.0214	57.1534	100.711	141.898	384.818	monoclinic	1.8446	2.72701	1
OBW	59.3012	65.168	5.97823	6.86194	22.861	26.0651	22.861	22.861	26.518	43.991	51.7995	159.758	tetragonal	1.1731	56.9681
OFF	50.8308	64.2503	1.39366	5.33876	18.1266	22.625	22.625	22.625	25.061	33.0473	50.122	256.944	hexagonal	1.5453	16.5271
OSI	50.0652	143.396	3.00722	3.71577	14.599	48.742	14.599	28.664	28.664	74.333	108.547	289.007	tetragonal	1.7062	7.90814
OSO	45.0406	82.9322	5.93773	7.43675	16.06	27.0398	16.06	16.06	18.442	36.885	63.7958	145.35	hexagonal	1.2005	67.6292
OWE	13.7202	119.118	0.975036	8.26661	3.66	28.785	3.66	13.755	28.785	33.6422	92.8412	277.677	orthorhombic	1.6564	16.7764
PHI	28.5304	90.0075	-3.00379	28.3637	7.60207	29.127	8.92	13.8171	27.567	29.127	79.3796	243.977	orthorhombic	1.5737	18.3284
RHO	26.3975	70.2856	4.33358	4.33358	9.148	26.076	18.296	18.296	26.076	26.076	26.076	230.756	cubic	1.379	21.3803
RRO	38.087	112.103	2.24661	7.35399	11.5914	43.4975	11.5914	21.6406	36.6913	68.9011	81.1498	217.731	monoclinic	1.6837	14.6905	1
RSN	52.6167	112.318	2.49877	6.22782	15.1726	42.607	15.1726	26.183	35.241	75.4428	93.4311	273.433	monoclinic	1.5998	28.0146
RTE	43.651	77.6263	2.95223	4.99556	15.7505	28.2237	17.3948	19.4977	29.5993	41.8404	56.1691	269.011	monoclinic	1.6215	10.5514	1
RTH	31.7975	81.838	2.12836	6.5138	9.75577	36.0529	9.75577	20.4682	21.9724	49.1726	73.0987	214.065	monoclinic	1.5227	13.4147
RUT	53.6765	91.1195	2.21232	6.48293	21.9653	33.7641	27.5767	28.6513	31.1888	42.8727	57.7001	289.137	monoclinic	1.6623	7.97253	1
RWR	84.4414	135.294	3.22364	4.12912	29.88	48.8364	29.88	29.88	36.037	94.6052	107.297	285.747	tetragonal	1.8506	10.7656	1
RWY	12.1367	19.9544	11.0575	11.0575	4.235	7.1795	4.235	4.235	4.235	14.359	14.359	90.436	cubic	0.7328	99.1924
SAS	23.5848	74.3764	2.26759	4.88685	6.915	34.731	13.83	18.472	18.472	34.731	38.4156	253.516	tetragonal	1.4816	15.5186	1
SBN	24.8272	146.303	2.37035	4.81074	6.703	48.0755	6.703	6.703	41.812	83.624	99.0304	264.527	hexagonal	1.5349	33.0571
SFE	47.651	133.735	2.1546	5.94865	15.126	44.5829	15.126	28.3194	34.757	83.5318	111.989	267.689	monoclinic	1.6419	9.89403
SFO	25.1479	66.4082	3.84405	7.10691	7.17973	27.4246	7.204	19.1255	24.0335	39.7366	56.2389	180.695	monoclinic	1.4375	19.5838
SGT	61.7647	91.115	4.02107	6.19851	22.23	38.8072	22.23	22.23	24.877	73.4	78.3148	216.659	tetragonal	1.6545	8.99901	1
SOD	61.3982	94.1674	2.8865	2.8865	21.751	34.5165	21.751	21.751	21.751	69.033	69.033	346.44	cubic	1.6289	7.01813	1
SOS	11.5455	73.0173	-9.90609	71.1512	7.43579	14.201	7.142	11.0716	14.201	24.324	46.3424	193.614	orthorhombic	1.6111	53.669
STF	52.5909	97.0047	1.22161	8.19638	21.4735	34.7174	21.4735	22.8861	24.9055	48.5466	75.6553	212.184	monoclinic	1.6012	11.2016	1
STI	27.6642	100.696	1.62328	6.06452	8.055	36.3805	8.055	16.65	36.508	60.0893	72.5332	242.308	orthorhombic	1.6046	15.5649
SZR	51.1315	99.4116	3.22347	3.62453	15.8966	38.464	27.564	31.789	31.917	38.464	69.4765	297.653	orthorhombic	1.6995	11.0022
THO	25.2525	106.643	3.13637	4.28427	7.737	47.2799	7.737	7.857	12.046	86.354	129.858	286.483	orthorhombic	1.5647	24.7439
TON	59.2695	143.964	2.21433	5.20961	18.799	55.9946	18.799	47.97	49.22	80.5022	110.425	323.251	orthorhombic	1.7738	4.70425	1
UEI	46.1376	68.2696	-1.8928	20.1573	16.6507	30.377	19.247	24.4956	25.751	30.377	34.1202	295.808	orthorhombic	1.7293	14.7507
UFI	40.3423	77.1587	1.72751	11.4234	18.9607	27.471	24.077	27.471	27.471	34.3602	55.984	244.248	tetragonal	1.4422	14.5337
UOS	44.4874	75.747	1.474	6.73428	15.2358	25.612	17.304	20.926	25.612	29.9174	51.6574	275.023	orthorhombic	1.6773	14.4529
UOZ	19.0997	78.3611	-7.32925	27.5143	10.542	30.145	7.723	20.1402	30.145	30.145	60.818	126.48	tetragonal	1.8112	23.047
VET	70.3553	121.77	4.09771	4.52963	25.274	48.6651	25.274	25.274	28.0297	87.8753	100.839	236.162	tetragonal	1.8046	6.4802	1
VFI	62.9143	150.132	2.64217	6.06454	23.483	39.4778	23.483	23.483	23.553	47.105	97.1305	225.266	hexagonal	1.3595	18.8253
VSV	81.0167	115.346	3.11099	5.0994	25.265	49.6284	25.265	35.864	35.864	91.541	100.66	275.393	tetragonal	1.5984	27.8714
WEI	18.1272	98.9182	-4.30405	19.9087	6.153	35.978	6.153	21.0003	33.141	35.978	61.4838	215.438	orthorhombic	1.4857	42.5851
YUG	41.3912	144.597	3.26009	5.5421	12.2645	52.09	12.2645	29.3495	50.1792	60.5998	87.5302	247.705	monoclinic	1.7294	10.3737
ZON	20.5483	79.2752	1.78179	7.8442	5.909	33.408	5.909	13.92	21.623	49.1947	66.752	200.595	orthorhombic	1.6564	17.902
